# Supplementary material for: A photocatalytic process for the eradication of dengue through ˙OH generation in the presence of sunlight and iron oxide
Source: Royal Society of Chemistry journal article supplement (doi:10.1039/c4ra13435d), 2014-11-19
Supplement: c4ra13435d1.pdf [file c4ra13435d1.pdf]

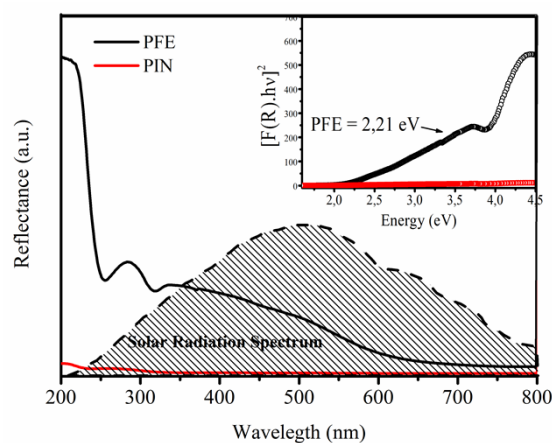

Figure S1. Diffuse reflectance spectra and the band gap calculation for PIN (red line) and PFE (black line). Kubelka-Munk function on the detail.

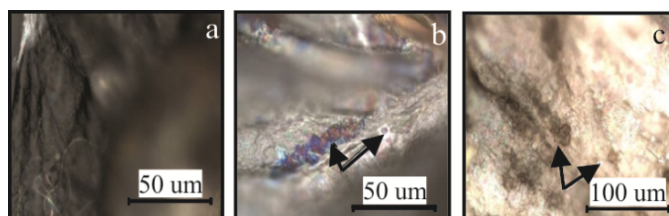

Figure S2. Optical images. (A) Live dengue larvae. (B, C) Dead dengue larvae.
